# Supplementary material
Source: PubMed Central journal article supplement (PMC3160043)
Supplement: supp_tpc.110.082651_Supplemental_Data.pdf [file supp_tpc.110.082651_Supplemental_Data.pdf]

## Supplemental Data

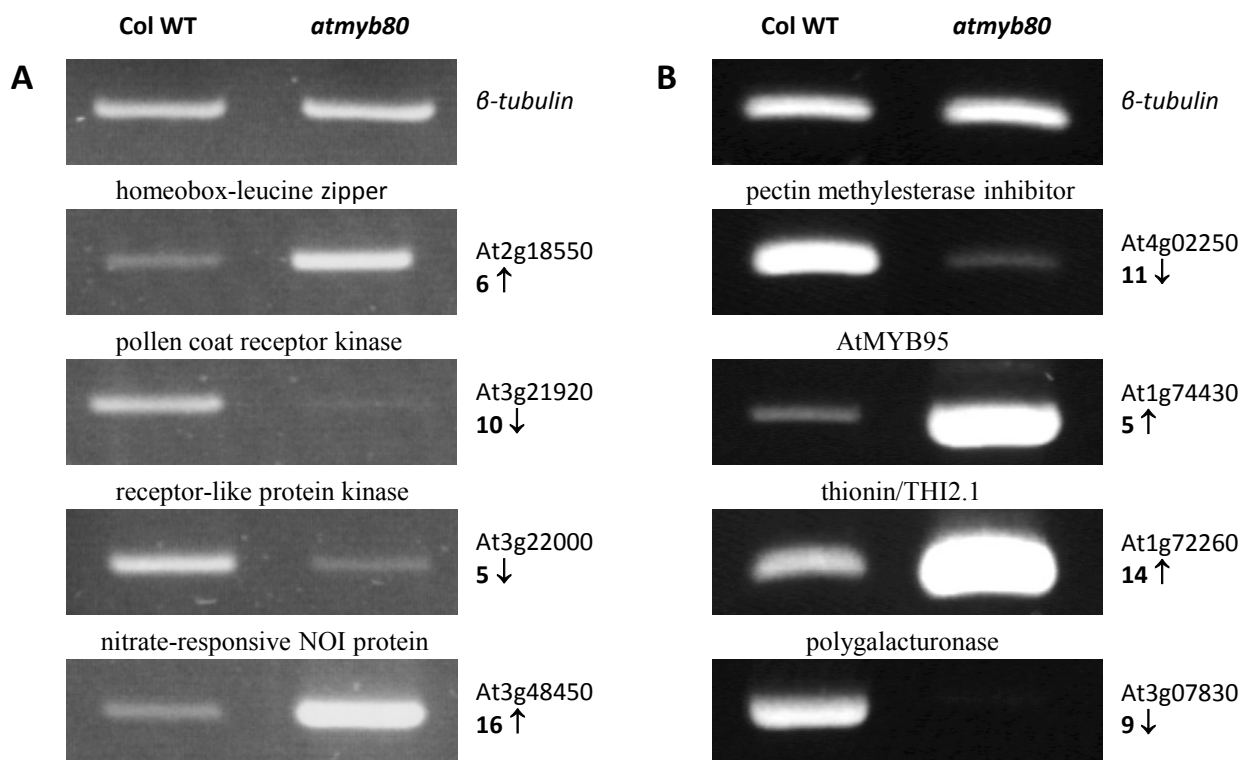

**Supplemental Figure 1.** RT-PCR analysis to validate the microarray data. RNA was obtained from dissected anthers of stages 5-8. To balance for input cDNA volume, *β-tubulin* amplification was used as a control. Three replicates were performed. A) 30 cycles. B) 32 cycles. Numbers and arrows represent the fold changes based on the microarray data. The RT-PCR result correlates with the fold changes as indicated by the microarray analysis. Primers are presented in Supplemental Table 5 online.

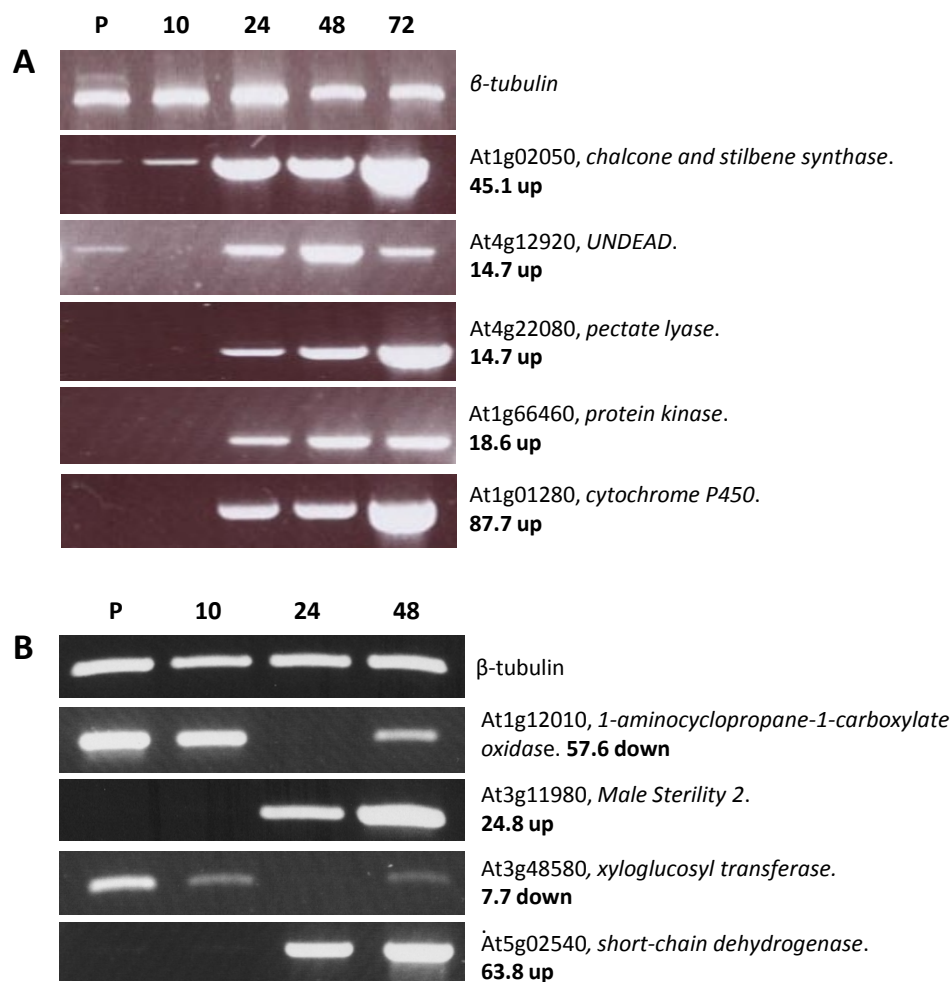

**Supplemental Figure 2.** RT-PCR analysis to validate the inducible microarray data. RNA was obtained from dissected anthers of stages 5-8. To balance for input cDNA volume, *β-tubulin* amplification was used as a control. Three replicates were performed. A) 32 cycles. B) 30 cycles. Bolded numbers represent the fold changes based on the microarray data at 24 hrs post-DEX induction. The RT-PCR result correlates with the fold changes as indicated by the microarray analysis. P, pre-DEX; 10, 8-10 hrs post-DEX; 24, 22-24 hrs post-DEX; 48, 46-48 hrs post-DEX; 72, 70-72 hrs post-DEX. Primers are presented in Supplemental Table 5 online.

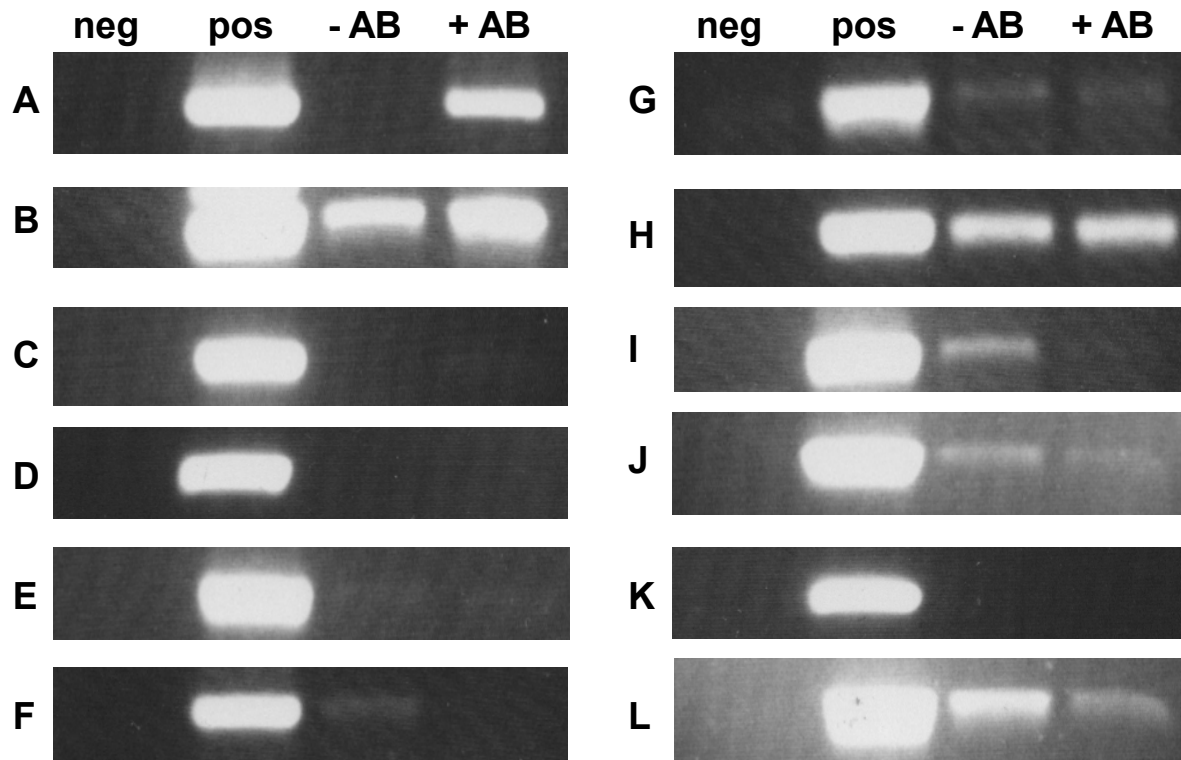

**Supplemental Figure 3.** ChIP assay using floral buds as input material. Two biological and three technical replicates were performed. A) At4g12920, *Aspartic protease/UNDEAD* is positively enriched. B) At1g67290, *glyoxal oxidase/GLOX1* is positively enriched. C) At5g22260, *Male Sterility 1*. D) At4g14080, A6 putative callase. E) At3g62180, pectin methylesterase. F) At5g52160, *protease inhibitor*. G) At4g22080, *pectate lyase*. H) At5g09550, *Rab-GDP dissociation inhibitor*. I) At2g47030, *vanguard1 homolog*. J) At3g23770, *glycosyl hydrolase*. K) At4g30040, *aspartyl protease*. L) At5g56110, *MYB80*. neg, no template control; pos, sonicated chromatin control; - AB, no AB final elution; + AB, with anti-GR PA-516 AB final elution. Primers are presented in Supplemental Table 5 online.

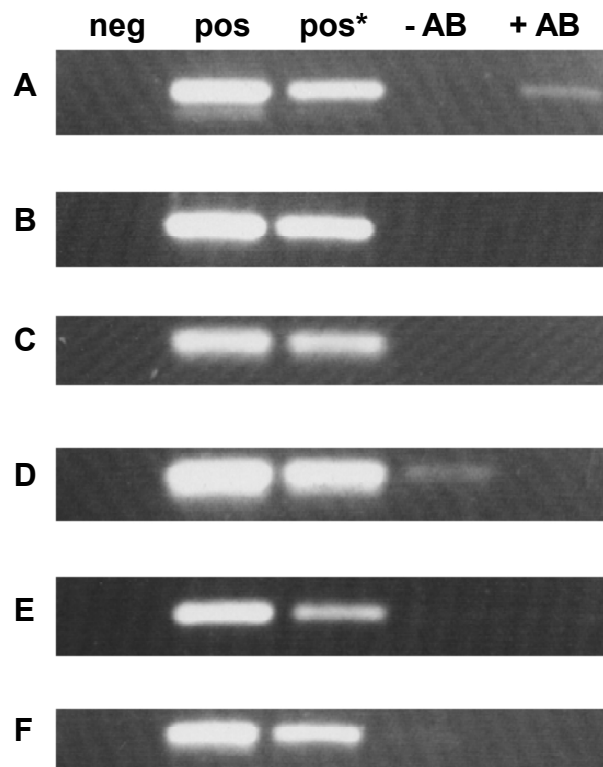

**Supplemental Figure 4.** ChIP assay using dissected anthers (stages 5 to 8) as input material. Two biological and three technical replicates were performed. A) At2g47040, *VANGUARD1* is enriched in the + AB treatment. B) At1g01280, *Cytochrome p450*. C) At3g11980, *Male Sterility 2*. D) At4g11760, *PCP* pollen coat protein. E) At3g01700, *AGP11* arabinogalactan-protein 11. F) At1g02790, *PGA4* polygalacturonase 4. neg, no template control; pos, sonicated chromatin control; pos\*, supernatant from post incubation with protein-A/agarose beads in no AB treatment; - AB, no AB final elution; + AB, with anti-GR PA-516 AB final elution. Primers are presented in Supplemental Table 5 online.

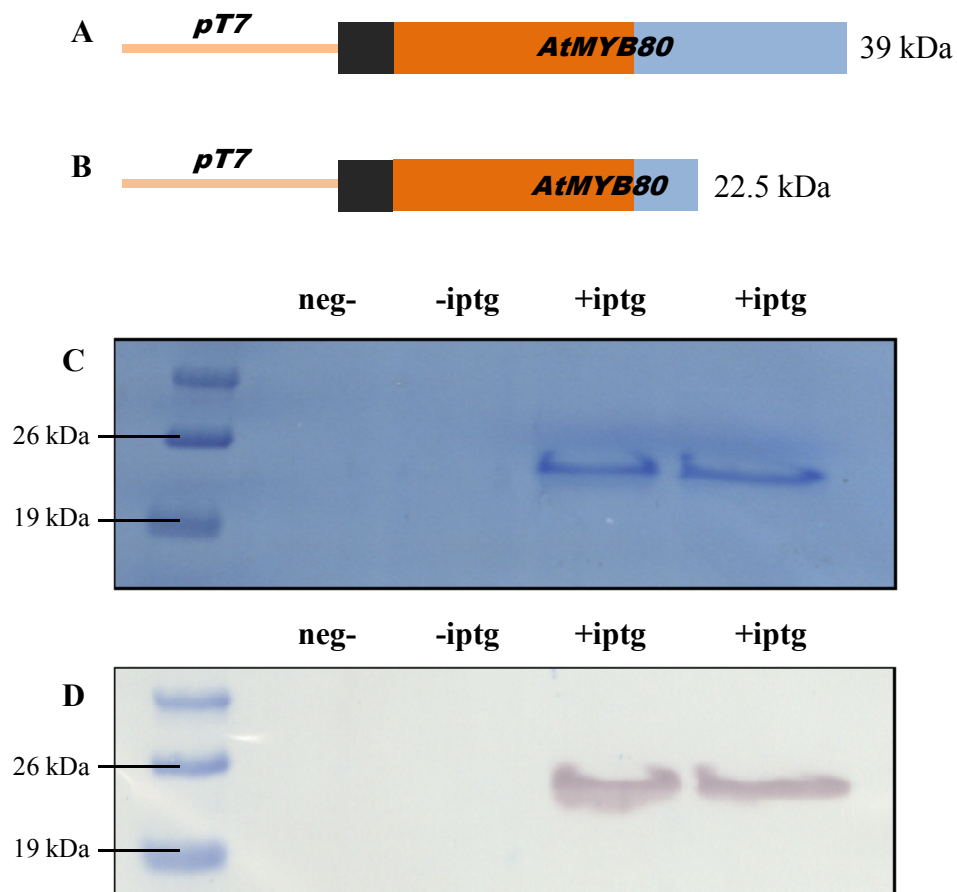

**Supplemental Figure 5.** Recombinant MYB80 protein expression and purification. A) Full-length *Arabidopsis thaliana* MYB80 cDNA was cloned into pRSET-B. B) MYB80 cDNA truncated in the C-terminal region after the MYB domain was cloned into pRSET-B. C) SDS-PAGE analysis of purified truncated MYB80 protein from *E. coli* resulted in a single band of ~23 kDa in the induced samples but not in the empty vector (neg-) or non induced (-iptg) samples. D) Western blot analysis using the anti-T7 antibody specific for the leader peptides of the recombinant MYB80 protein. Black bar, T7 leader peptides and histidine tag; orange bar, MYB domain; blue bar, MYB80 C-terminal region. The predicted size of both proteins are indicated in kDa.

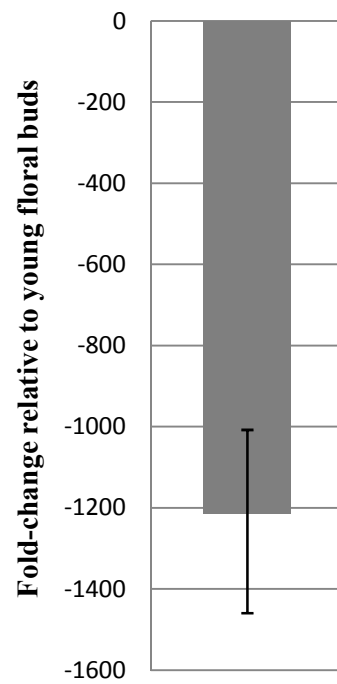

**Supplemental Figure 6.** Comparative RT-qPCR analysis of *MYB80* transcript levels in wild-type mature (anther stages 10-12) vs. young (anther stages  $\leq 9$ ) floral buds. qPCR data was gathered from 3 replicates. Error bar represent SD. *MYB80* transcript level is lower in mature floral buds.

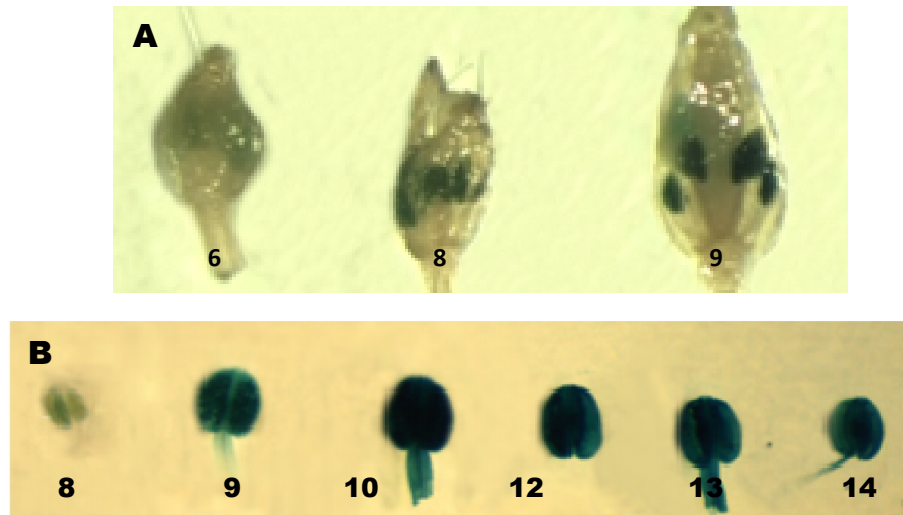

**Supplemental Figure 7.** Promoter:*GUS* expression analysis. A) The *UNDEAD* promoter drives *GUS* activity in anthers at developmental stages 6 to 9. B) The *GLOX1* promoter directs *GUS* activity in anthers from developmental stage 8 onwards, reaching a peak at stage 10 and persisting to anther dehiscence at stage 14.

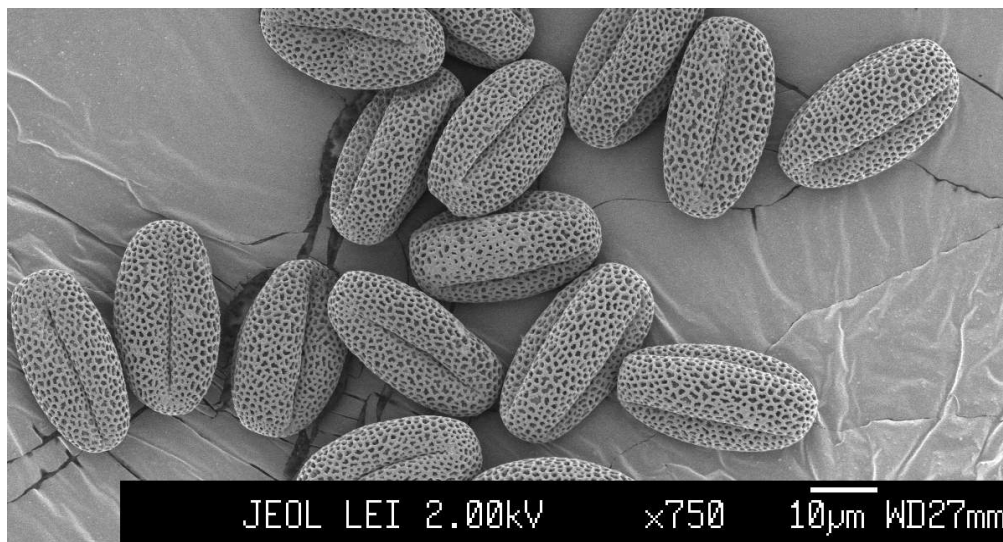

**Supplemental Figure 8.** Scanning electron micrograph of wild-type Arabidopsis pollen grain.



**Supplemental Table 1.** Summary of T-DNA insertion mutants analysed for phenotypic changes in male fertility. Genes were selected from the *myb80* (10 genes) and the inducible microarray datasets (12 genes). T-DNA lines were germinated on media containing either kanamycin or sulfadiazine to select for transgenic plants. PCR was used to screen for the presence of the T-DNA and to identify homozygous lines. Pollen from homozygous plants were examined for phenotypic changes in morphology and tested for pollen viability by Alexander's staining. Silique elongation was also observed. The primers used in PCR screening are listed. a; gene-specific primers used to identify homozygous lines. Gene specific primer and left border primer (LBa1 or LBb1 for SALK lines and pAC161 8760 primer for GABI-Kat lines) was used to verify the presence of the T-DNA. b; contains T-DNA insertion but failed to grow in the presence of kanamycin.

| Locus ID  | Gene description                  | T-DNA line               | Primers <sup>a</sup> | Pollen phenotype | Silique phenotype |
|-----------|-----------------------------------|--------------------------|----------------------|------------------|-------------------|
| At1g02470 | expressed protein                 | SALK_123221              | 1g024, F & R         | Wt               | Wt                |
| At1g12010 | ACC oxidase, putative             | SALK_007181              | 1g120, F & R         | Wt               | Wt                |
| At1g23760 | polygalacturonase, putative       | SALK_086372              | 1g237, F & R         | Wt               | Wt                |
| At1g49000 | expressed protein                 | SALK_023230              | 1g490, F & R         | Wt               | Wt                |
| At1g52410 | protein binding                   | GABI-Kat<br>299G09       | 1g524, F & R         | Wt               | Wt                |
| At1g74430 | MYB95                             | NASC_314F0               | 74430+1F,<br>+1710R  | Wt               | Wt                |
| At2g13570 | CCAAT-box                         | SALK_130081 <sup>b</sup> | 13570-429F,<br>+648R | Wt               | Wt                |
| At2g18550 | transcription factor              | SAIL_790_D09             | 2g185, F & R         | Wt               | Wt                |
| At2g35930 | U-box domain protein              | SALK_063470              | 2g359, F & R         | Wt               | Wt                |
| At3g17220 | pectin methylesterase inhibitor   | NASC_227H0               | 17220+1F,<br>+522R   | Wt               | Wt                |
| At3g21920 | pollen coat                       | SALK_050491              | 3g219, F & R         | Wt               | Wt                |
| At3g22000 | protein kinase                    | GABI_215A11              | 3g220, F & R         | Wt               | Wt                |
| At3g25730 | AP2                               | SALK_007234 <sup>b</sup> | 25730+1F,<br>+1115R  | Wt               | Wt                |
| At3g23770 | glycosyl hydrolase family 17      | SALK_033100              | 3g237, F & R         | Wt               | Wt                |
| At3g48450 | nitrate response                  | SALK_077128              | 3g484, F & R         | Wt               | Wt                |
| At3g62230 | F-box                             | SALK_020875              | 62230+1F,<br>+1386R  | Wt               | Wt                |
| At4g02250 | pectin methylesterase inhibitor   | SALK_139236              | 02250+1F,<br>+438R   | Wt               | Wt                |
| At5g02540 | short-chain hydrogenase reductase | SALK_103967              | 5g025, F & R         | Wt               | Wt                |
| At5g24870 | zinc finger family protein        | SALK_015310              | 5g248, F & R         | Wt               | Wt                |
| At5g45840 | LRR protein kinase                | SALK_054077              | 5g458, F & R         | Wt               | Wt                |
| At5g48880 | PKT1, 3-ketoacyl-CoA thiolase     | SALK_144464              | 5g488, F & R         | Wt               | Wt                |
| At5g51830 | pfkB-type kinase family protein   | SALK_046463              | 5g518, F & R         | Wt               | Wt                |

**Supplemental Table 2.** Genes identified to be differentially expressed 24 hrs post-dexamethasone induction of functional MYB80 compared to non-induced and *myb80* mutant.

| Probe ID    | Locus     | Gene Description                                | Dex24 |    | p-value   |
|-------------|-----------|-------------------------------------------------|-------|----|-----------|
| 246968_at   | At5g24870 | zinc finger (C3HC4-type RING finger)            | 2.39  | up | 0.001104  |
| 247293_at   | At5g64510 | expressed protein                               | 2.26  | up | 0.017253  |
| 248110_at   | At5g55320 | membrane bound O-acyl transferase (MBOAT)       | 7.66  | up | 0.001277  |
| 248368_at   | At5g51950 | glucose-methanol-choline (GMC)                  | 6.88  | up | 0.001309  |
| 248381_at   | At5g51830 | pfkB-type carbohydrate kinase family protein    | 2.96  | up | 0.001924  |
| 248625_at   | At5g48880 | acetyl-CoA C-acyltransferase 1                  | 3.23  | up | 0.002413  |
| 248697_at   | At5g48370 | thioesterase family protein                     | 2.24  | up | 0.012563  |
| 248916_at   | At5g45840 | leucine-rich transmembrane protein kinase       | 2.22  | up | 0.001081  |
| 250082_at   | At5g17200 | polygalacturonase (pectinase)                   | 4.29  | up | 0.009879  |
| 250541_at   | At5g09520 | hydroxyproline-rich glycoprotein family protein | 2.26  | up | 0.017994  |
| 251013_at   | At5g02540 | short-chain dehydrogenase                       | 63.84 | up | 4.39E-06  |
| 251940_at   | At3g53450 | hypothetical protein                            | 2.19  | up | 0.001283  |
| 248350_at   | At5g52160 | protease inhibitor/seed storage protein         | 5.97  | up | 0.0028878 |
| 252527_at   | At3g46440 | NAD-dependent epimerase                         | 2.25  | up | 0.002744  |
| 253294_at   | At4g33750 | expressed protein                               | 2.86  | up | 0.001447  |
| 253638_at   | At4g30470 | cinnamoyl-CoA reductase-related                 | 4.02  | up | 0.001137  |
| 253652_at   | At4g30040 | aspartyl protease family                        | 9.85  | up | 0.006218  |
| 254090_at   | At4g25010 | nodulin MtN3 family protein                     | 5.76  | up | 0.007241  |
| 254338_s_at | At4g22080 | pectate lyase family protein                    | 14.69 | up | 0.003593  |
| 254792_at   | At4g12920 | aspartyl protease/UNDEAD                        | 14.67 | up | 0.003295  |
| 256359_at   | At1g66460 | protein kinase family protein                   | 18.63 | up | 0.001708  |
| 256662_at   | At3g11980 | male sterility protein 2 (MS2)                  | 24.85 | up | 0.011961  |
| 256962_at   | At3g13560 | glycosyl hydrolase family 17 protein            | 3.06  | up | 0.001163  |
| 257170_at   | At3g23770 | glycosyl hydrolase family 17 protein            | 37.49 | up | 0.00277   |
| 260056_at   | At1g78140 | methyltransferase-related                       | 2.08  | up | 0.018037  |
| 260287_at   | At1g80440 | kelch repeat-containing F-box family protein    | 7.72  | up | 0.001816  |
| 260546_at   | At2g43520 | trypsin inhibitor, putative                     | 2.15  | up | 0.014175  |
| 260693_at   | At1g32450 | proton-dependent oligopeptide transport (POT)   | 2.68  | up | 0.003949  |
| 260754_at   | At1g49000 | expressed protein                               | 6.85  | up | 3.52E-04  |
| 260883_at   | At1g29270 | expressed protein                               | 13.14 | up | 2.18E-05  |
| 260933_at   | At1g02470 | expressed protein                               | 4.214 | up | 0.005961  |
| 261051_at   | At1g01280 | cytochrome P450 family protein                  | 87.68 | up | 0.001727  |
| 263005_at   | At1g54540 | hypothetical protein                            | 10.16 | up | 7.89E-05  |
| 263496_at   | At2g42570 | expressed protein                               | 2.89  | up | 0.004921  |
| 263935_at   | At2g35930 | U-box domain-containing protein                 | 5.94  | up | 0.010747  |
| 264039_at   | At2g03740 | LEA domain-containing protein                   | 2.15  | up | 0.003771  |
| 264175_at   | At1g02050 | chalcone and stilbene synthase family protein   | 45.11 | up | 2.68E-05  |
| 265131_at   | At1g23760 | BURP domain-containing polygalacturonase        | 24.84 | up | 8.99E-05  |
| 265263_at   | At2g42940 | DNA-binding family protein                      | 56.97 | up | 4.00E-06  |
| 266273_at   | At2g29410 | zinc transporter, putative                      | 4.96  | up | 0.004739  |
| 266321_at   | At2g46660 | cytochrome P450, putative                       | 2.6   | up | 0.001934  |

|                    |           |                                                  |       |      |           |
|--------------------|-----------|--------------------------------------------------|-------|------|-----------|
| <b>267150_at</b>   | At2g23510 | transferase family protein                       | 5.99  | up   | 2.25E-05  |
| <b>267483_at</b>   | At2g02810 | UDP-galactose/UDP-glucose transporter            | 2.52  | up   | 7.94E-04  |
| <b>267541_at</b>   | At2g32750 | exostosin family protein                         | 2.16  | up   | 0.002524  |
| <b>259986_at</b>   | At1g75050 | thaumatin-like protein, putative                 | 7.73  | up   | 7.56E-04  |
| <b>259987_at</b>   | At1g75030 | pathogenesis-related thaumatin family protein    | 6.53  | up   | 3.87E-04  |
| <b>245232_at</b>   | At4g25590 | actin-depolymerizing factor, putative            | 6.03  | down | 0.0105804 |
| <b>245335_at</b>   | At4g16160 | import inner membrane translocase                | 4.27  | down | 0.0125576 |
| <b>245912_at</b>   | At5g19600 | sulfate transporter, putative                    | 2.92  | down | 9.05E-04  |
| <b>248211_at</b>   | At5g54010 | glycosyltransferase family protein               | 2.62  | down | 0.0067784 |
| <b>248227_at</b>   | At5g53820 | expressed protein                                | 22.07 | down | 0.0020433 |
| <b>248484_at</b>   | At5g51030 | short-chain dehydrogenase/reductase (SDR)        | 3.42  | down | 0.0133266 |
| <b>250514_at</b>   | At5g09550 | Rab GDP dissociation inhibitor, putative         | 7.65  | down | 0.0057648 |
| <b>250561_at</b>   | At5g08030 | glycerophosphoryl diester phosphodiesterase      | 8.87  | down | 6.51E-04  |
| <b>251250_at</b>   | At3g62180 | invertase/pectin methylesterase inhibitor family | 2.25  | down | 0.0022099 |
| <b>252440_at</b>   | At3g47440 | major intrinsic family protein                   | 13.68 | down | 1.81E-04  |
| <b>254886_at</b>   | At4g11760 | expressed protein                                | 11.75 | down | 0.0166252 |
| <b>255580_at</b>   | At4g01470 | major intrinsic family protein                   | 7.52  | down | 0.0067914 |
| <b>256581_at</b>   | At3g28830 | expressed protein                                | 46.7  | down | 0.0014606 |
| <b>256588_at</b>   | At3g28790 | expressed protein                                | 23.16 | down | 0.0068463 |
| <b>257102_at</b>   | At3g25050 | xyloglucan:xyloglucosyl transferase, putative    | 18.58 | down | 0.0012607 |
| <b>257691_at</b>   | At3g12660 | fasciclin-like arabinogalactan family protein    | 2.083 | down | 3.90E-04  |
| <b>258058_at</b>   | At3g28980 | expressed protein                                | 31.41 | down | 0.0025556 |
| <b>258498_at</b>   | At3g02480 | ABA-responsive protein-related                   | 5.26  | down | 0.0139488 |
| <b>259189_at</b>   | At3g01700 | arabinogalactan-protein (AGP11)                  | 3.41  | down | 0.0081282 |
| <b>261462_at</b>   | At1g07850 | fringe-related protein                           | 2.024 | down | 0.0068629 |
| <b>262122_at</b>   | At1g02790 | exopolysaccharuronase                            | 21.22 | down | 0.0010092 |
| <b>263950_at</b>   | At2g36020 | abscisic acid-responsive HVA22 family protein    | 2.04  | down | 0.0174042 |
| <b>264124_at</b>   | At1g79360 | transporter-related                              | 2.29  | down | 0.0191997 |
| <b>264993_at</b>   | At1g67290 | glyoxal oxidase/AtGLOX1                          | 2.91  | down | 0.0051945 |
| <b>265405_at</b>   | At2g16750 | protein kinase family protein                    | 7.73  | down | 0.0040933 |
| <b>266750_s_at</b> | At2g47040 | Pectinesterase/VANGUARD1                         | 29.19 | down | 0.0066573 |
| <b>266764_at</b>   | At2g47050 | invertase/pectin methylesterase inhibitor family | 8.85  | down | 0.0139459 |
| <b>252320_at</b>   | At3g48580 | xyloglucan:xyloglucosyl transferase              | 7.76  | down | 1.74E-05  |
| <b>259272_at</b>   | At3g01290 | band 7 family protein                            | 2.12  | down | 0.007131  |
| <b>262119_s_at</b> | At1g02930 | glutathione S-transferase, putative              | 2.62  | down | 0.007567  |
| <b>264346_at</b>   | At1g12010 | 1-aminocyclopropane-1-carboxylate oxidase        | 57.6  | down | 1.54E-05  |
| <b>265983_at</b>   | At2g18550 | homeobox-leucine zipper family protein           | 5.18  | down | 0.007386  |
| <b>263475_at</b>   | At2g31945 | expressed protein                                | 2.74  | down | 0.004911  |

**Supplemental Table 3.** List of overlapping genes (30) present in both the *ms1* (Yang et al. 2007) and *myb80* microarray dataset.

| <b>Locus</b> | <b>Function or description</b>                      | <b>FC in <i>ms1</i></b> | <b>FC in <i>myb80</i></b> |
|--------------|-----------------------------------------------------|-------------------------|---------------------------|
| AT1G06990    | GDSL-motif lipase/hydrolase family protein          | -5.708                  | -2.1                      |
| AT1G24400    | lysine and histidine specific transporter, putative | -3.647                  | -2.8                      |
| AT1G52400    | glycosyl hydrolase family 1 protein                 | 2.86                    | 4.5                       |
| AT1G54870    | short-chain dehydrogenase/reductase (SDR)           | -2.691                  | -5.1                      |
| AT1G55560    | multi-copper oxidase type I family protein          | -7.646                  | -3.9                      |
| AT1G63180    | UDP-glucose 4-epimerase, putative                   | -3.617                  | -2.5                      |
| AT1G75910    | family II extracellular lipase 4 (EXL4)             | -43.098                 | -2.8                      |
| AT1G77210    | sugar transporter, putative                         | -2.054                  | -4.2                      |
| AT1G80660    | ATPase 9, plasma membrane-type, putative            | -5.894                  | -7.6                      |
| AT2G03200    | aspartyl protease family protein                    | -6.04                   | -2.8                      |
| AT2G03850    | LEA domain-containing protein                       | -14.985                 | -6.6                      |
| AT2G18550    | homeobox-leucine zipper family protein              | -4.578                  | -5.18                     |
| AT2G41040    | methyltransferase-related                           | -4.292                  | -2.5                      |
| AT3G25050    | xyloglucosyl transferase, putative                  | -36.233                 | -18.58                    |
| AT3G52160    | beta-ketoacyl-CoA synthase family protein           | -13.885                 | -3.6                      |
| AT4G01430    | nodulin MtN21 family protein                        | -2.274                  | -2                        |
| AT4G14270    | expressed protein                                   | -2.69                   | -2                        |
| AT4G16160    | import inner membrane translocase                   | -3.132                  | -4.27                     |
| AT4G26830    | glycosyl hydrolase family 17 protein                | -3.149                  | -2                        |
| AT4G27260    | auxin-responsive GH3 family protein                 | -3.768                  | 3.6                       |
| AT4G35190    | expressed protein                                   | -2.884                  | -2.5                      |
| AT5G14980    | esterase/lipase/thioesterase family protein         | -2.578                  | -2.5                      |
| AT5G15140    | aldose 1-epimerase family protein                   | 5.202                   | 4.2                       |
| AT5G44400    | FAD-binding domain-containing protein               | -15.714                 | -5.8                      |
| AT5G49070    | beta-ketoacyl-CoA synthase family protein           | -3.135                  | -5.9                      |
| AT5G53190    | nodulin MtN3 family protein                         | 2.591                   | 4.3                       |
| AT5G54510    | auxin-responsive GH3 protein, putative (DFL-1)      | -2.779                  | 5                         |
| AT5G63070    | 40S ribosomal protein S15, putative                 | -2.701                  | -2.1                      |
| AT5G65660    | hydroxyproline-rich glycoprotein family protein     | -2.128                  | -2.3                      |
| AT5G66020    | phosphoinositide phosphatase family protein         | -2.202                  | -4.3                      |

**Supplemental Table 4.** List of overlapping genes (66) present in both the *ams* (Xu et al. 2010) and *myb80* microarray dataset.

| <b>Locus</b> | <b>Function or description</b>                       | <b>FC in <i>myb80</i></b> |
|--------------|------------------------------------------------------|---------------------------|
| At1g06990    | GDSL-motif lipase/hydrolase family protein           | -2.1                      |
| At1g13970    | expressed protein                                    | 3.2                       |
| At1g22990    | copper chaperone (CCH)-related                       | 4                         |
| At1g26480    | 14-3-3 protein GF14 iota (GRF12)                     | -7.6                      |
| At1g32450    | proton-dependent oligopeptide transport (POT) family | -3.3                      |
| At1g32780    | alcohol dehydrogenase, putative                      | -3.8                      |
| At1g44800    | nodulin MtN21 family protein                         | 4.9                       |
| At1g52400    | glycosyl hydrolase family 1 protein                  | 4.5                       |
| At1g55560    | multi-copper oxidase type I family protein           | -3.9                      |
| At1g63180    | UDP-glucose 4-epimerase, putative                    | -2.5                      |
| At1g70810    | C2 domain-containing protein                         | -2.1                      |
| At1g71680    | lysine and histidine specific transporter, putative  | -13.3                     |
| At1g71810    | ABC1 family protein                                  | -2.6                      |
| At1g71880    | sucrose transporter (SUC1)                           | -8.2                      |
| At1g73220    | sugar transporter family protein                     | -3.3                      |
| At1g75050    | pathogenesis-related protein, putative               | -3.4                      |
| At1g75750    | gibberellin-regulated protein 1 (GASA1)              | 2.3                       |
| At1g75910    | family II extracellular lipase 4 (EXL4)              | -2.8                      |
| At1g77210    | sugar transporter, putative                          | -4.2                      |
| At1g77590    | long-chain-fatty-acid--CoA ligase family protein     | -2.1                      |
| At1g80130    | expressed protein                                    | -4.1                      |
| At2g03850    | LEA domain-containing protein                        | -6.6                      |
| At2g07040    | leucine-rich repeat transmembrane protein kinase     | -2.4                      |
| At2g07180    | protein kinase, putative                             | -3                        |
| At2g18550    | homeobox-leucine zipper family protein               | -5.18                     |
| At2g19000    | expressed protein                                    | -8.9                      |
| At2g41040    | methyltransferase-related                            | -2.5                      |
| At2g46140    | LEA domain-containing protein                        | -4.4                      |
| At3g01240    | expressed protein                                    | 10.4                      |
| At3g01700    | arabinogalactan-protein (AGP11)                      | -3.4                      |
| At3g03430    | calcium-binding pollen allergen, putative            | -10.1                     |
| At3g13390    | multi-copper oxidase type I family protein           | -12.7                     |
| At3g25050    | xyloglucosyl transferase, putative                   | -18.58                    |
| At3g28810    | hypothetical protein                                 | -4.9                      |
| At3g52160    | beta-ketoacyl-CoA synthase family protein            | -3.6                      |
| At3g62230    | F-box family protein                                 | -11.4                     |
| At4g00040    | chalcone and stilbene synthase family protein        | -5.1                      |
| At4g00350    | MATE efflux family protein                           | -2.4                      |
| At4g00750    | dehydration-responsive family protein                | 3.3                       |
| At4g01430    | nodulin MtN21 family protein                         | -2                        |
| At4g08290    | nodulin MtN21 family protein                         | -2.3                      |

|           |                                                          |       |
|-----------|----------------------------------------------------------|-------|
| At4g13230 | LEA domain-containing protein                            | -7.5  |
| At4g13790 | auxin-responsive protein, putative                       | -4.8  |
| At4g16160 | import inner membrane translocase                        | -4.27 |
| At4g20050 | expressed protein                                        | -2    |
| At4g25040 | integral membrane family protein                         | -10.1 |
| At4g26260 | expressed protein                                        | -2.3  |
| At4g30810 | serine carboxypeptidase S10 family protein               | -2.4  |
| At4g35010 | glycosyl hydrolase family 35 protein                     | -11.5 |
| At4g35180 | amino acid transporter family protein                    | -3.4  |
| At5g07430 | pectinesterase family protein                            | -17.9 |
| At5g11420 | expressed protein                                        | 2.4   |
| At5g20230 | plastocyanin-like domain-containing protein              | -8.3  |
| At5g24655 | expressed protein                                        | -2.7  |
| At5g44400 | FAD-binding domain-containing protein                    | -5.8  |
| At5g45340 | cytochrome P450 family protein                           | -3.5  |
| At5g46940 | invertase/pectin methylesterase inhibitor family protein | -6.7  |
| At5g47000 | peroxidase, putative                                     | -9.2  |
| At5g48880 | acetyl-CoA C-acyltransferase 1                           | 3.23  |
| At5g49070 | beta-ketoacyl-CoA synthase family protein                | -5.9  |
| At5g49900 | expressed protein                                        | 3.6   |
| At5g51950 | glucose-methanol-choline (GMC)                           | 6.88  |
| At5g53190 | nodulin MtN3 family protein                              | 4.3   |
| At5g59120 | subtilase family protein                                 | -7.6  |
| At5g62080 | seed storage/lipid transfer protein (LTP) family         | 4.3   |
| At5g62850 | nodulin MtN3 family protein                              | -8.3  |

**Supplemental Table 5.** Primer sequences used in this article.

| <i>Name</i>           | <i>Gene / Vector</i>                 | <i>Nucleotide sequence</i>                                                         |
|-----------------------|--------------------------------------|------------------------------------------------------------------------------------|
| <b>Vectors/Probes</b> |                                      |                                                                                    |
| 103GR-F               | AtMYB80:GR Forward                   | 5'-CTCGTCGACGGCAAGGAGCTTCTATGGCCAA-3'                                              |
| 103GR-R               | AtMYB80:GR Reverse                   | 5'CTCCTGCAGTGGCTTGCTGAACCATATGATTGATGAGATCATC-3'                                   |
| AspF-BamHI            | siRNA pUNDEAD Forward                | 5'-AATTGGATCCCTTTGCAAATATTGAAATAAGCC-3'                                            |
| AspR-Hind3            | siRNA pUNDEAD Reverse                | 5'-AATTAAGCTTCATTGTGGTTTTTCATTTAAACTG-3'                                           |
| Asp121+F              | siRNA 121 Forward                    | 5'AATTAAGCTTAAAGTTGTTTCTCTTCCACTCTTCAAGAGAGAGTGAAGAGAAACAACCTTTTTTTAAACTAGTTTAA-3' |
| Asp121+R              | siRNA 121 Reverse                    | 5'TTAAACTAGTTTAAAAAAGTTGTTTCTCTTCCACTCTCTCTTGAAGAGTGAAGAGAAACAACCTTTAAGCTTAATT-3'  |
| Asp297+F              | siRNA 297 Forward                    | 5'AATTAAGCTTAAATACCGACCAGCAGCTTCTTCAAGAGAGAAGCTGCTGGTTCGGTATTTTTTTTAAACTAGTTTAA-3' |
| Asp297+R              | siRNA 297 Reverse                    | 5'TTAAACTAGTTTAAAAAATAACCGACCAGCAGCTTCTCTTGAAGAAGCTGCTGGTTCGGTATTTTAAGCTTAATT-3'   |
| pUndeadF              | Undead promoter: <i>GUS</i> For.     | 5'-CACCTTTGCAAATATTGAAATAAGCC-3'                                                   |
| pUndeadR              | Undead promoter: <i>GUS</i> Rev.     | 5'-CAAATTCATTGTGGTTTTTCAT-3'                                                       |
| pVGD1F                | Vanguard1 promoter: <i>GUS</i> For.  | 5'-CACCCGCTGATTTTACTTTTTGTGGATTTG-3'                                               |
| pVGD1R                | Vanguard1 promoter: <i>GUS</i> Rev.  | 5'-ATCGGAGAGGGAGGGGCTTTATTAG-3'                                                    |
| pGLOX1F               | AtGLOX1 promoter: <i>GUS</i> For.    | 5'-CACCCGTAAACTAATCAATTTCAAG-3'                                                    |
| pGLOX1R               | AtGLOX1 promoter: <i>GUS</i> Rev.    | 5'-AGAGTCTTGTTGACTTTTTTCAT-3'                                                      |
| AtPr-KpnF             | AtMYB80 Protein Forward              | 5'-TACCAAGGTACCATGGGTCGGATTCCATGTTGT-3'                                            |
| AtPr896R              | AtMYB80 Protein Reverse (+896)       | 5'-TGTTATAAGCTTCTAAGGCTTGTGGGTCACCGGATC-3'                                         |
| AtPr1015R             | AtMYB80 Protein Reverse (+1015)      | 5'-TGTTATAAGCTTCTAAGGAACTTGGTGAGCAAGTG-3'                                          |
| eVANF                 | EMSA VGD1 Probe For.                 | 5'-ATCCGCAACTAAGCAATTACA-3'                                                        |
| eVANR                 | EMSA VGD1 Probe Rev.                 | 5'-CTATTGTGATGGATGCTGGAG-3'                                                        |
| eGLOXF                | EMSA AtGLOX1 Probe For.              | 5'-GAAAGGCAAACGTATAGAGGA-3'                                                        |
| eGLOXR                | EMSA AtGLOX1 Probe Rev.              | 5'-GGACAATAAGGAATGATGTCT-3'                                                        |
| eAspF                 | EMSA UNDEAD Probe For.               | 5'-GATATGATATTAGATGATCTAC-3'                                                       |
| eAspR                 | EMSA UNDEAD Probe Rev.               | 5'-GTAGTTTGACACTAAAGTAAGAG-3'                                                      |
| <b>RT-PCR/qPCR</b>    |                                      |                                                                                    |
| β-TUB R3 Rev          | β-tubulin For.                       | 5'-GGCTCTGTATTGCTGTGATCCACG-3'                                                     |
| β-TUB F2 For          | β-tubulin Rev.                       | 5'-GGACATACACTGAAGGTGCTGAG-3'                                                      |
| 3g11980F              | MS2 For.                             | 5'-ATCAGTTTCCTCCAAGGGAAGAAGTT-3'                                                   |
| 3g11980R              | MS2 Rev.                             | 5'-ATTACCGGGCCCTCTTGTGTTGATGT-3'                                                   |
| 1g01280+1F            | Cytochrome p450 For.                 | 5'-ATGATTTTGGTGCTAGCCTCCCTCTTC-3'                                                  |
| 1g01280+1533R         | Cytochrome p450 Rev.                 | 5'-TTATGTGTACAAATGAGCTGCCAATCG-3'                                                  |
| 1g02050+1F            | Chalcone and stilbene synth For.     | 5'-ATGTCGAATTCTAGGATGAATGGTGT-3'                                                   |
| 1g02050+1188R         | Chalcone and stilbene synth Rev.     | 5'-TTAGGAAGAGGTGAGGCTGCGGATGAG-3'                                                  |
| 4g12920+1F            | Aspartyl protease UNDEAD For.        | 5'-ATGAAAACCACAAATGAATTTTGTTTTTTC-3'                                               |
| 4g12920+1170R         | Aspartyl protease UNDEAD Rev.        | 5'-CTACATATCACAATCTTGTTTATTAAT-3'                                                  |
| 4g22080+90F           | Pectate lyase For.                   | 5'-ACCCCCACGGTTGCCAACTACGTCCCCGAG-3'                                               |
| 4g22080+1185R         | Pectate lyase Rev.                   | 5'-CTAATAACAAGGGCCGTTGCGGTTGCA-3'                                                  |
| 1g66460+1F            | Protein kinase For.                  | 5'-ATGATTCCTGATTTGGGTTTTCCCTTGT-3'                                                 |
| 1g66460+1404R         | Protein kinase Rev.                  | 5'-CTACAAAAGATCATCAGCTTCAAATTC-3'                                                  |
| At1g12010F            | ACC oxidase For.                     | 5'-ACCATGGCTTTGATCGACGATGCTTG-3'                                                   |
| At1g12010R            | ACC oxidase Rev.                     | 5'-CTCTGGTTTAGGACATGGTGGATAGT-3'                                                   |
| At3g48580F            | Xyloglucosyl transferase For.        | 5'-AACCTCTGAGCTCCAGCTCACCCCTCG-3'                                                  |
| At3g48580R            | Xyloglucosyl transferase Rev.        | 5'-CTTGCTGTACACCCTGATCGGTGTAT-3'                                                   |
| At5g02540F            | Short-chain dehydrogenase For.       | 5'-AGGAAGAAGAGGACCAAGTGGATTTG-3'                                                   |
| At5g02540R            | Short-chain dehydrogenase Rev.       | 5'-TAAGACCAGGGTGAAGTGAATTTGCT-3'                                                   |
| 3g07830+1F            | Pectinase SALK 035568 For.           | 5'-ATGGGTTTCATATTTTGGAAATTTCTACA-3'                                                |
| 3g07830+1194R         | Pectinase SALK 035568 Rev.           | 5'-TTACTTAGGTTGGGTCAGCACGGGTGG-3'                                                  |
| 4g02250+1F            | Pectin methylesterase inhibitor For. | 5'-ATGAAAATGGCCGGAAGGATCTTTCTC-3'                                                  |
| 4g02250+438R          | Pectin methylesterase inhibitor Rev  | 5'-TTAGGGAGTTAAAATAGTGTTAATGAG-3'                                                  |
| 1g74430+1F            | MYB95 NASC_314F0 For.                | 5'-ATGGGGTGGACGACGTGGTTCGACGTT-3'                                                  |
| 1g74430+1710R         | MYB95 NASC_314F0 Rev.                | 5'-TCAAAGAAGGAACAGGTCAAGGTGTTTC-3'                                                 |

|              |                               |                                    |
|--------------|-------------------------------|------------------------------------|
| 1g72260-370F | Thionin SALK 039929 For.      | 5'-GAAAACCTTTAAACGTTGGCCTACG-3'    |
| 1g72260+405R | Thionin SALK 039929 Rev.      | 5'-TTACAACAGTTT TAGGCGGCCAGGTGG-3' |
| UBQ10F       | Ubiquitin 10 (At4g05320) For. | 5'-TCCGGATCAGCAGAGGCTTA-3'         |
| UBQ10R       | Ubiquitin 10 (At4g05320) Rev. | 5'-TCAGAACTCTCCACCTCAAG-3'         |
| qAsp+72F     | UNDEAD qPCR For.              | 5'-CACTCTACATATCCCTCTTGTGC-3'      |
| qAsp+219R    | UNDEAD qPCR Rev.              | 5'-CTGCTACCCGATCCATGTGA-3'         |
| qGLOXF       | AtGLOX1 qPCR For.             | 5'-GTTCGATATTAACACCCGGAGACATC-3'   |
| qGLOXR       | AtGLOX1 qPCR Rev.             | 5'-GTTTGCTCCTCCTTGGAAATCCTC-3'     |
| qVANF        | VGD1 qPCR For.                | 5'-CAGCCCTGGAACCACCACTTCC-3'       |
| qVANR        | VGD1 qPCR Rev.                | 5'-CCGTTCACTCTGATAGCCACAG-3'       |
| qMYB80F      | AtMYB80 qPCR For.             | 5'-GTTTCACTCTGTTCTTGGTAACC-3'      |
| qMYB80R      | AtMYB80 qPCR Rev.             | 5'-CGGATCTATTCCCATTCCTGAC-3'       |

**TDNA/RT-PCR**

|             |                                 |                                    |
|-------------|---------------------------------|------------------------------------|
| pAC161 8760 | pAC161 T-DNA left border        | 5'-GGGCTACACTGAATTGGTAGCTC-3'      |
| LBa1        | SALK T-DNA left border          | 5'-TGGTTCACGTAGTGGGCCATCG-3'       |
| LBb1        | SALK T-DNA left border          | 5'-GCGTGGACCGCTTGCTGCAACT-3'       |
| 1g524F      | Protein binding                 | 5'-ACAGTGTCTCTTCGTCATCTTTGTC-3'    |
| 1g524R      | Protein binding                 | 5'-TGTTGCGTTGCTCTTTAAGTTTAG-3'     |
| 2g185F      | Transcription factor (RT-PCR)   | 5'-TGTTTTTACAAGATGATGGACACC-3'     |
| 2g185R      | Transcription factor (RT-PCR)   | 5'-TACAATTTGGATGCTTTGACATTC-3'     |
| 3g219F      | Pollen coat (RT-PCR)            | 5'-AAGGAGTCTGATTCGATTATTCCC-3'     |
| 3g219R      | Pollen coat (RT-PCR)            | 5'-CCATATCAGGTTCTTTACCGTAGG-3'     |
| 3g220F      | Protein kinase (RT-PCR)         | 5'-TCTTTATTATTTGCTTTCAACGCC-3'     |
| 3g220R      | Protein kinase (RT-PCR)         | 5'-TTCTCTTTTACAACGTTCTCGTTTG-3'    |
| 3g484F      | Nitrate response (RT-PCR)       | 5'-TAGCACACATGACACAAACCTATG-3'     |
| 3g484R      | Nitrate response (RT-PCR)       | 5'-CGAGCTTTATTGAAAATGACAGTG-3'     |
| 1g024F      | Expressed protein               | 5'-CTCCATAAACGGTTTCATTGC-3'        |
| 1g024R      | Expressed protein               | 5'-CCAAATCGACTCACCGTTAAC-3'        |
| 1g120F      | ACC oxidase                     | 5'-TTACCCAATCGGATCAAAGTG-3'        |
| 1g120R      | ACC oxidase                     | 5'-ACCCAAGCTTTGTGTTTGATG-3'        |
| 1g237F      | BURP domain, polygalac.         | 5'-CTCGTCGTATGCCAAGAACTC-3'        |
| 1g237R      | BURP domain, polygalac.         | 5'-ATTCTCGTAGAACCGTTTGC-3'         |
| 1g490F      | Expressed protein               | 5'-CGGACACTAGAGATTACATCGG-3'       |
| 1g490R      | Expressed protein               | 5'-TTGTCCCCAAAACAACAAG-3'          |
| 2g185F      | Homeobox-leucine zipper         | 5'-TCTTTTAATCAAGAGTTCCTATTTGTG-3'  |
| 2g185R      | Homeobox-leucine zipper         | 5'-GGATGCTTTGACATTCACATG-3'        |
| 2g359F      | U-box domain-containing         | 5'-TCACCCGAATCACACTCTAC-3'         |
| 2g359R      | U-box domain-containing         | 5'-CAGCATCTCTCATATATGTGATTGC-3'    |
| 3g237F      | Glycosyl hydrolase              | 5'-ACATGTTGCATTGCTTCTTCC-3'        |
| 3g237R      | Glycosyl hydrolase              | 5'-AAAACCATTAAAGCAGGCCAC-3'        |
| 5g025F      | Short-chain dehydrogenase       | 5'-GCAATTCGATTCCATCTTACAG-3'       |
| 5g025R      | Short-chain dehydrogenase       | 5'-AGGACCAAGTGGATTTGGTTC-3'        |
| 5g248F      | Zinc finger family protein      | 5'-TTATGTTGGCAAGGCAAAGTC-3'        |
| 5g248R      | Zinc finger family protein      | 5'-AGCAGCTCTTCGAGTAGAGGG-3'        |
| 5g458F      | LRR protein kinase              | 5'-AAATGGGTTAAAAAGAAGCCG-3'        |
| 5g458R      | LRR protein kinase              | 5'-CTTAACCGATGATTACGCAGC-3'        |
| 5g488F      | 3-ketoacyl-CoA thiolase 1       | 5'-TCAACGTCAGCGATATTGATC-3'        |
| 5g488R      | 3-ketoacyl-CoA thiolase 1       | 5'-TACTCAATGGCAACAACATCG-3'        |
| 5g518F      | pfkB-type kinase family         | 5'-CCATTGAAAGTTGACTCAGGG-3'        |
| 5g518R      | pfkB-type kinase family         | 5'-AGCAGCTCTTCGAGTAGAGGG-3'        |
| 74430+1F    | MYB95 NASC_314F0                | 5'-ATGGGGTGGACGACGTGGTTCGACGTT-3'  |
| 74430+1710R | MYB95 NASC_314F0                | 5'-TCAAAGAAGGAACAGGTCAAGGTGTTTC-3' |
| 13570-429F  | CCAAT-Box SALK 130081           | 5'-CCAAAGTTTCAAATAGTGCCTTT-3'      |
| 13570+648R  | CCAAT-Box SALK 130081           | 5'-TCACCAGTGAATTGAATCAATGTTATT-3'  |
| 17220+1F    | Pectin methylesterase inhibitor | 5'-ATGGCAGCATACCTGACGAACAGAGTT-3'  |
| 17220+522R  | Pectin methylesterase inhibitor | 5'-TCACATCATGTTTGAGATGACAAGTAC-3'  |
| 25730+1F    | AP2 SALK 007234                 | 5'-ATGGATGCCATGAGTAGCGTAGACGAG     |
| 25730+1115R | AP2 SALK 007234                 | 5'-TAATTTTTTCCACTTGTTACAACCTTAC-3' |
| 62230+1F    | F-box SALK 020875               | 5'-ATGGACTCAGGAAGTGCAGTGGACATC-3'  |



|             |                                 |                                   |
|-------------|---------------------------------|-----------------------------------|
| 62230+1386R | F-box SALK 020875               | 5'-TTAGTAAAAAGTAACGACCAAATTCTC-3' |
| 02250+1F    | Pectin methylesterase inhibitor | 5'-ATGAAAATGGCCGGAAGGATCTTTCTC-3' |
| 02250+438R  | Pectin methylesterase inhibitor | 5'-TTAGGGAGTTAAAATAGTGTTAATGAG-3' |

**ChIP/qChIP**

|            |                                |                                 |
|------------|--------------------------------|---------------------------------|
| At4g12920F | Aspartyl protease              | 5'-TGGTGTTACATACTTTTATATCC-3'   |
| At4g12920R | Aspartyl protease              | 5'-CTCTTACTTTAGTGTCAAACACTAC-3' |
| At1g67290F | Glyoxal oxidase                | 5'-GGTAGAAGCTTTCCACTTTAT-3'     |
| At1g67290R | Glyoxal oxidase                | 5'-AGACATCATTCCCTTATTGTCC-3'    |
| At2g47040F | Vanguard                       | 5'-GTAACCTCGGTTTTATACAAGT-3'    |
| At2g47040R | Vanguard                       | 5'-CTCCAGCATCCATCACAATAG-3'     |
| At2g47050F | Vanguard homolog               | 5'-CATACAAATTAACAAATCTTTTAC-3'  |
| At2g47050R | Vanguard homolog               | 5'-TCCATTCTTTCCAATCCACGT-3'     |
| At3g23770F | Glycosyl hydrolase 17          | 5'-GCAATACGTTCTACCAAGTTGA-3'    |
| At3g23770R | Glycosyl hydrolase 17          | 5'-ACACACTTCTTAATCTCTTCT-3'     |
| At3g62180F | Pectin methylesterase          | 5'-GTTTCGAATTTCAAATATACCACA-3'  |
| At3g62180R | Pectin methylesterase          | 5'-TCCGAGATCCGTTCCCTTTCCG-3'    |
| At4g16160F | Inner membrane translocase     | 5'-AGCGGAGATGACACGTGTCCACGT-3'  |
| At4g16160R | Inner membrane translocase     | 5'-AGAGAGAAGCAACAAGTGAAGA-3'    |
| At4g22080F | Pectate lyase                  | 5'-TGGCTTGATACCGGTTCCGGTTT-3'   |
| At4g22080R | Pectate lyase                  | 5'-ACACCTTCTAATCTTTCCGACAC-3'   |
| At5g09550F | Rab GDP dissociation inhibitor | 5'-ACCACCTGTTTCGTCTAATTATAG-3'  |
| At5g09550R | Rab GDP dissociation inhibitor | 5'-CAATAACGGAGATAGAGATCGA-3'    |
| At5g52160F | Protease inhibitor             | 5'-CAACTAGTCTGTCTCCATTATCA-3'   |
| At5g52160R | Protease inhibitor             | 5'-CACTAAACACTTAAATAAATCA-5'    |
| At1g01280F | Cytochrome p450                | 5'-ACTATGATGTTTCGTGCACACC-3'    |
| At1g01280R | Cytochrome p450                | 5'-ACTTAGCTACTAGTCTTCCAT-3'     |
| At1g02790F | Polygalacturonase 4            | 5'-AGCTATGACGCTCCGACATAA-3'     |
| At1g02790R | Polygalacturonase 4            | 5'-AGCATACTAAGTAGCACTATA-3'     |
| At3g01700F | Arabinogalactan protein 11     | 5'-AACCTTTTGTGGTGGGCTTGA-3'     |
| At3g01700R | Arabinogalactan protein 11     | 5'-AACCTTTTGTGGTGGGCTTGA-3'     |
| At4g11760F | Pollen coat protein            | 5'-CAAGTAAACAGAATCGATGTAG-3'    |
| At4g11760R | Pollen coat protein            | 5'-TAGTCCATATGTTTTTTCCTT-3'     |
| At3g11980F | MS2                            | 5'-CATCATCTTTTGTCTTAGAA-3'      |
| At3g11980R | MS2                            | 5'-CTTCTGTTTCTCAAAGATA-3'       |
| At4g30030F | Aspartyl protease              | 5'-GATTTATGTTTATCAGAGATC-3'     |
| At4g30030R | Aspartyl protease              | 5'-GGATTGGAAGAAAACACATTC-3'     |
| At4g30040F | Aspartyl protease              | 5'-GTATCATGATCATGGATACCAC-3'    |
| At4g30040R | Aspartyl protease              | 5'-GTCAATGTGTATGTGAAGTGT-3'     |
| A6F        | A6 callase (At4g14080)         | 5'-CTACATAAATTGTTTTTCATCG-3'    |
| A6R        | A6 callase (At4g14080)         | 5'-GTCTTTGTGTTTGTGTCTGGT-3'     |
| At5g56110F | AtMYB80                        | 5'-TCCAAGTCGTTCTACCAATCC-3'     |
| At5g56110R | AtMYB80                        | 5'-ATATCAAAGATTGCCCCACCC-3'     |
| At1g02930F | Glutathione S-transferase      | 5'-CTCTCGTTCTATCGAATGATC-3'     |
| At1g02930R | Glutathione S-transferase      | 5'-CAAACGGCGCCACCAAGCTTG-3'     |
| At3g02480F | LEA, ABA-responsive            | 5'-ACGACAGTACAAGAAGAAGG-3'      |
| At3g02480R | LEA, ABA-responsive            | 5'-ATGATTGGAGCATTGGGTTGC-3'     |
| At3g01290F | Band 7 family protein          | 5'-ATTCGATTCTCTTACTACAG-3'      |
| At3g01290R | Band 7 family protein          | 5'-GAGAAGAAAGTCGCAGGAGTG-3'     |
| At2g43520F | Trypsin inhibitor              | 5'-TTGGTAAGGACTCACATAAG-3'      |
| At2g43520R | Trypsin inhibitor              | 5'-ACTTTGGAGTTAACGTATGTG-3'     |
| At2g42570F | Expressed protein              | 5'-TCAGCTTATTTGAACCAAGCT-3'     |
| At2g42570R | Expressed protein              | 5'-TGAGAGCGAGATTGGTGTGAG-3'     |
| At2g02810F | UDP-galactose transporter 1    | 5'-GAACATACGAGTTTTATTTCAG-3'    |
| At2g02810R | UDP-galactose transporter 1    | 5'-GGTTAACGATGACGCGTGTAC-3'     |
| At2g46660F | Cytochrome P450                | 5'-CAACGTCGATCGATTCTCATG-3'     |
| At2g46660R | Cytochrome P450                | 5'-AGATGAGCAGATGGCTTTGG-3'      |
| At2g03740F | LEA, late embryogenesis        | 5'-GATTCTCACTTTGTCTTCTTAC-3'    |
| At2g03740R | LEA, late embryogenesis        | 5'-GTTAGAGGAACCAAGTGAGTC-3'     |

|            |                                |                               |
|------------|--------------------------------|-------------------------------|
| At1g29270F | Expressed protein              | 5'-AGCTACCAGTTTATCACCAAC-3'   |
| At1g29270R | Expressed protein              | 5'-TCTGCATAATAACTCATTGGC-3'   |
| At1g78140F | Methyltransferase              | 5'-AACATGTAATCTACTAAGCCC-3'   |
| At1g78140R | Methyltransferase              | 5'-GCAGCCTATTGAGCACGAAGC-3'   |
| At1g54540F | LEA, late embryogenesis        | 5'-GTTGTTGCTGAACATAGAGATG-3'  |
| At1g54540R | LEA, late embryogenesis        | 5'-TAGTAATACTAATGCACCAAC-3'   |
| At5g22260F | MS1                            | 5'-CCAGTTTCTAATATTACAGAAG-3'  |
| At5g22260R | MS1                            | 5'-GAATAGGAATATGATAGATTTGG-3' |
| At5g48880F | Acetyl-CoA C-acyltransferase 1 | 5'-ATCCGATATGAATTCTTGTGG-3'   |
| At5g48880R | Acetyl-CoA C-acyltransferase 1 | 5'-TGCCAAAACCTTGTCTTGTGG-3'   |
